# Supplementary material for: A Short Corticosteroid Course Reduces Symptoms and Immunological Alterations Underlying Long-COVID
Source: MDPI journal article supplement (doi:10.3390/biomedicines9111540), 2021-10-26
Supplement: s1 [file s1]

# Supplementary Materials

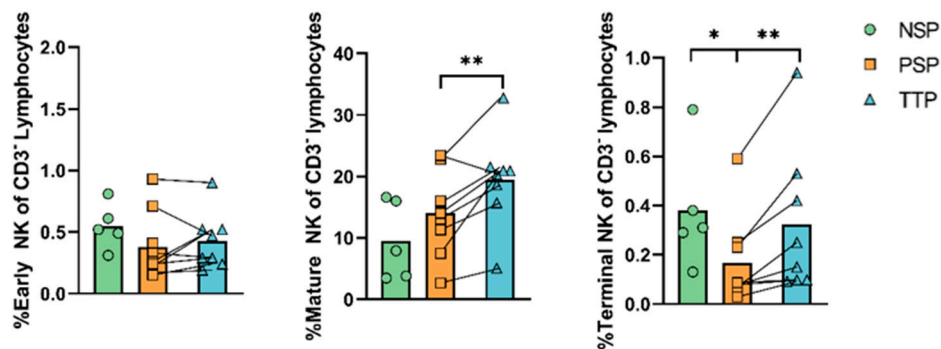

Figure S1. NK cell subpopulations in NSP, PSP and TTP. \*,  $p < 0.05$ ; \*\*,  $p < 0.01$ .

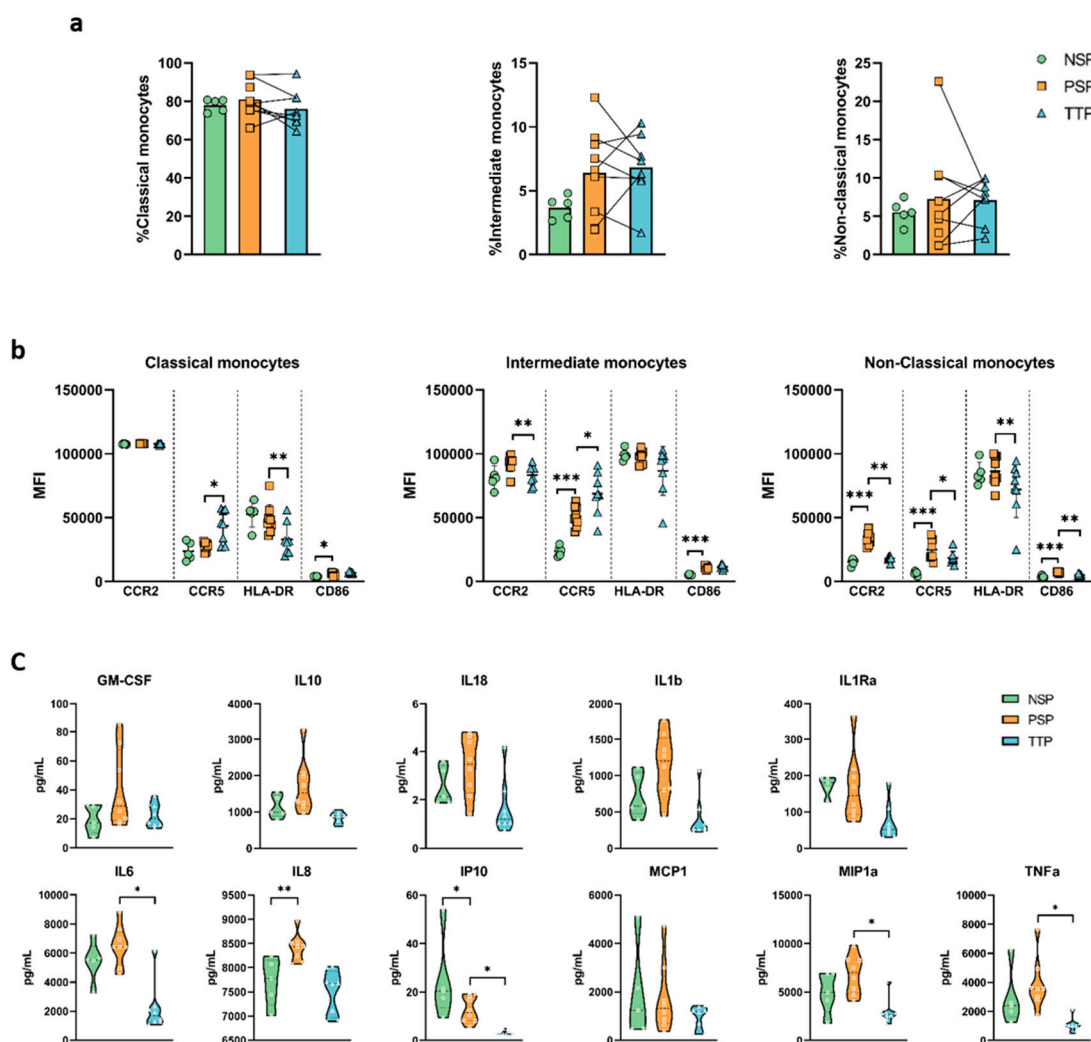

Figure S2. Higher expression of chemotactic and co-stimulatory molecules on monocytes from PSP. (a) Comparison of classical, intermediate and non-classical monocytes between NSP, PSP and TTP. (b) Expression of CCR2, CCR5, HLA-DR and CD86 on classical, intermediate and non-classical monocytes from NSP, PSP and TTP. (c) Secretion of GM-CSF, IL10, IL18, IL1b, IL1Ra, IL6, IL8, IP10, MCP1, MIP1a and TNFa upon LPS in vitro stimulation of monocytes isolated from NSP, PSP and TTP. \*,  $p < 0.05$ ; \*\*,  $p < 0.01$ ; \*\*\*,  $p < 0.001$ .

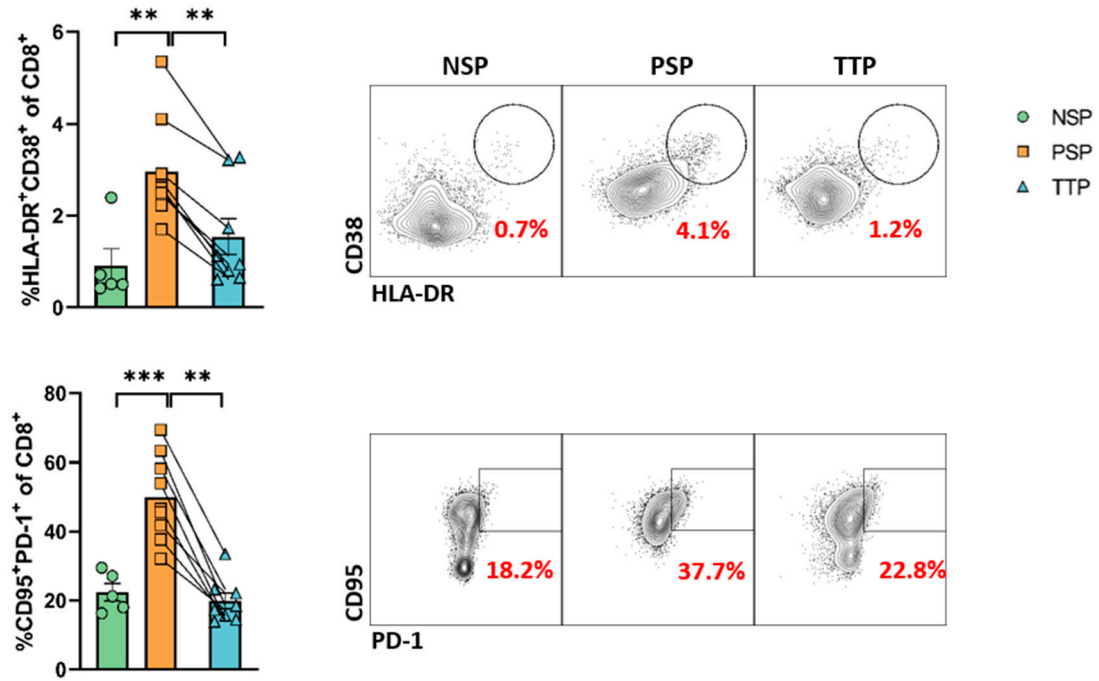

Figure S3. Expression of activation and senescence markers on CD8 T cells. \*\*,  $p < 0.01$ ; \*\*\*,  $p < 0.001$ .

Isolated CD14<sup>-</sup> cells

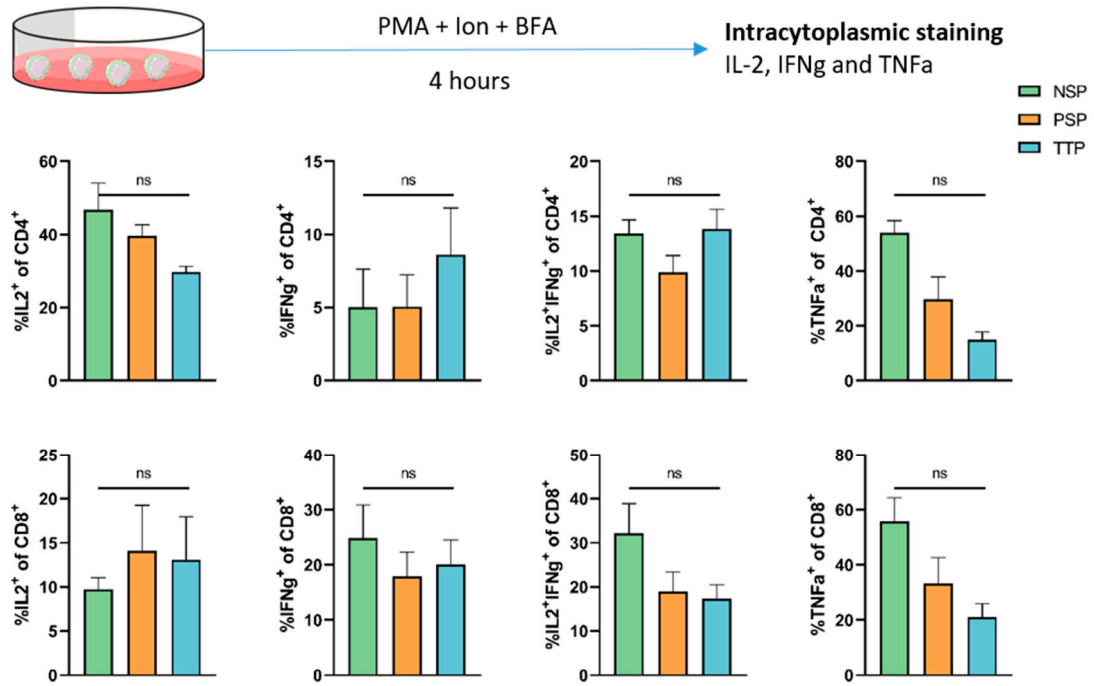

Figure S4. Intracytoplasmic pro-inflammatory cytokine detection in CD4<sup>+</sup> and CD8<sup>+</sup> T cells upon in vitro stimulation.

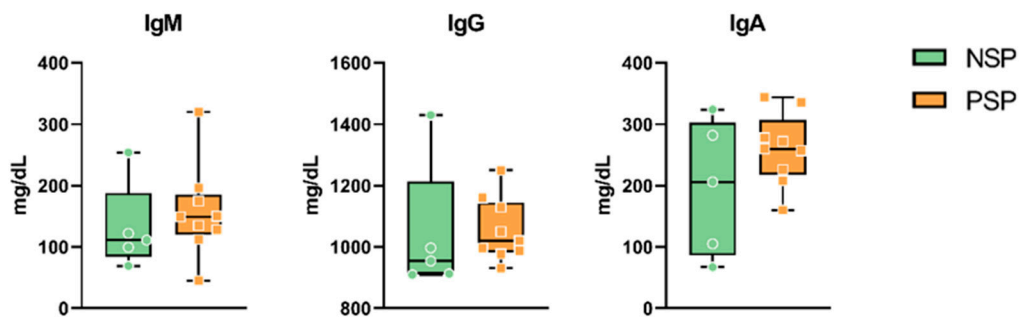

Figure S5. Immunoglobulin M, G and A levels in plasma from NSP and PSP.

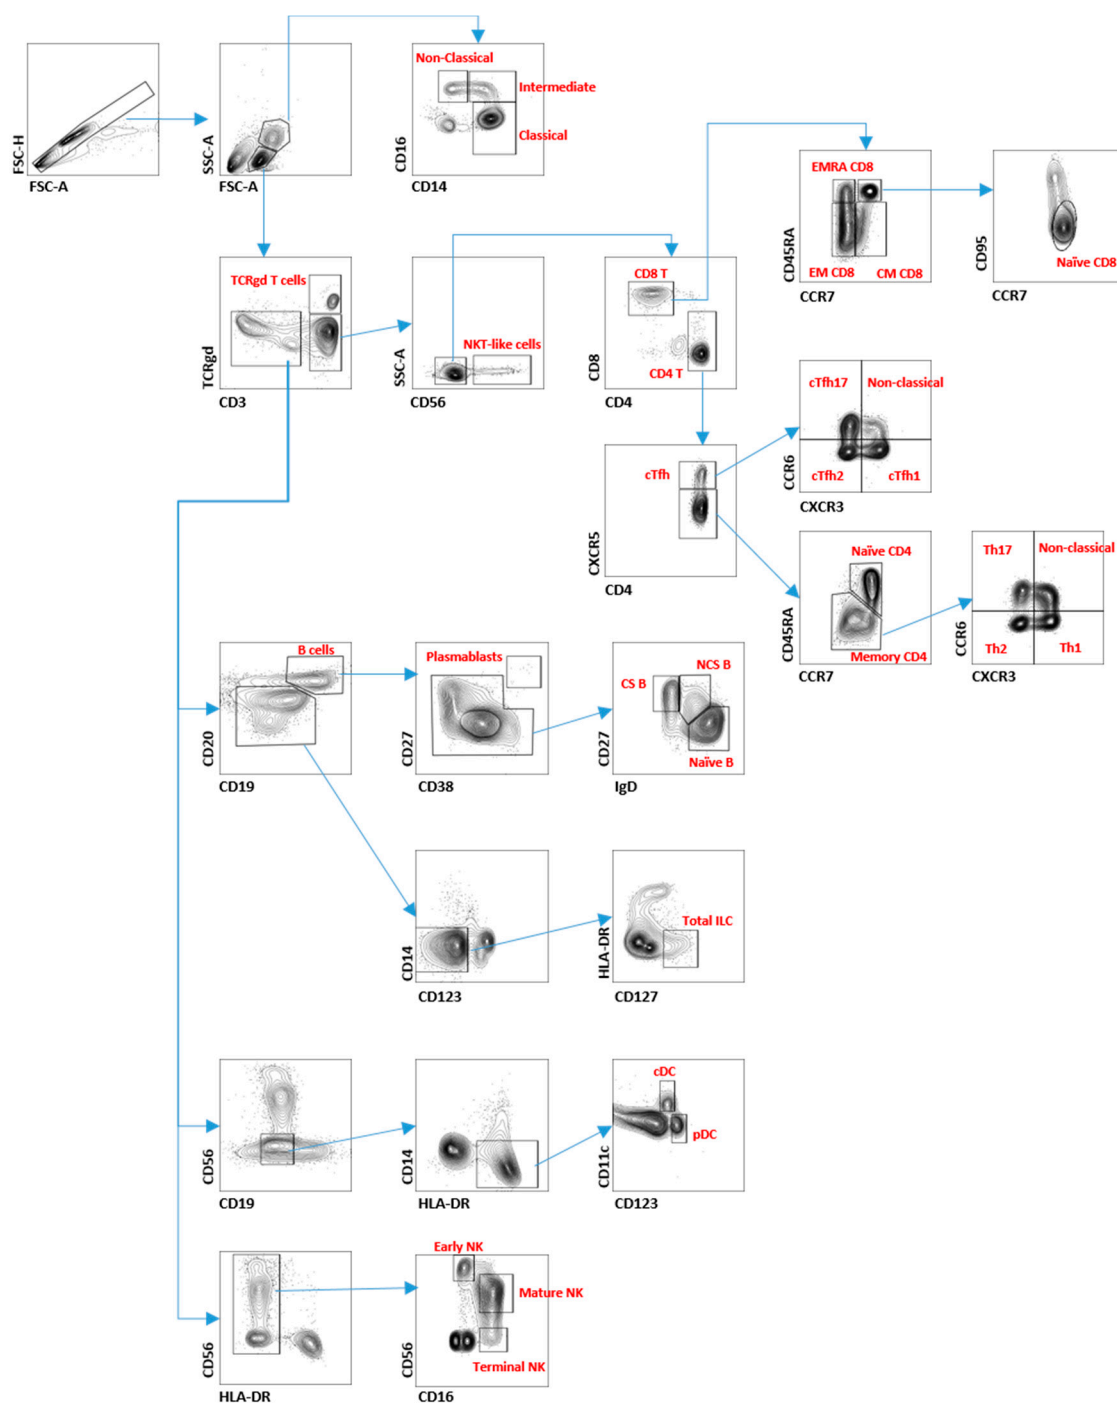

Figure S6. Flow cytometry gating strategy.
