# Supplementary material for: A Short Corticosteroid Course Reduces Symptoms and Immunological Alterations Underlying Long-COVID
Source: MDPI journal article supplement (doi:10.3390/biomedicines9111540), 2021-10-26
Supplement: s1 [file s1]

Supplementary Materials

Table S1. Characteristics of post-COVID-19 patients.

| Patient    | Group | Sex    | Age | Hospitalization | Months from acute COVID-19 | Arthralgia  | Myalgia     | Dyspnea     | Asthenia    | Paresthesia | Dizziness  | Anxiety     | Insomnia    | Headache    | Brain fog | Anosmia | Dysgeusia |
|------------|-------|--------|-----|-----------------|----------------------------|-------------|-------------|-------------|-------------|-------------|------------|-------------|-------------|-------------|-----------|---------|-----------|
| Patient 1  | NSP   | Male   | 25  | No              | 6                          | No          | No          | No          | No          | No          | No         | No          | No          | No          | No        | No      | No        |
| Patient 2  | NSP   | Female | 26  | No              | 8                          | No          | No          | No          | No          | No          | No         | No          | No          | No          | No        | No      | No        |
| Patient 3  | NSP   | Male   | 62  | No              | 6                          | No          | No          | No          | No          | No          | No         | No          | No          | No          | No        | No      | No        |
| Patient 4  | NSP   | Female | 56  | Yes             | 13                         | No          | No          | No          | No          | No          | No         | No          | No          | No          | No        | No      | No        |
| Patient 5  | NSP   | Female | 52  | No              | 3                          | No          | No          | No          | No          | No          | No         | No          | No          | No          | No        | No      | No        |
| Patient 6  | PSP   | Female | 61  | No              | 13                         | Yes         | Yes         | Yes         | Yes         | Yes         | No         | Yes         | Yes         | Yes         | No        | No      | No        |
| Patient 6  | TTP   |        |     |                 |                            | Complete R. | No         | Complete R. | Complete R. | Complete R. | No        | No      | No        |
| Patient 7  | PSP   | Female | 49  | No              | 3                          | Yes         | Yes         | No          | No          | Yes         | No         | No          | No          | No          | No        | No      | No        |
| Patient 7  | TTP   |        |     |                 |                            | Partial R.  | Partial R.  | No          | No          | Complete R. | No         | No          | No          | No          | No        | No      | No        |
| Patient 8  | PSP   | Male   | 56  | Yes             | 13                         | Yes         | Yes         | Yes         | Yes         | Yes         | Yes        | Yes         | Yes         | No          | Yes       | Yes     | No        |
| Patient 8  | TTP   |        |     |                 |                            | No R.       | No R.       | Partial R.  | No R.       | No R.       | No R.      | No R.       | No R.       | No          | No R.     | No R.   | No        |
| Patient 9  | PSP   | Female | 43  | No              | 8                          | Yes         | Yes         | Yes         | Yes         | Yes         | Yes        | No          | Yes         | Yes         | Yes       | Yes     | Yes       |
| Patient 9  | TTP   |        |     |                 |                            | Partial R.  | Partial R.  | No R.       | Partial R.  | No R.       | No R.      | No          | No R.       | No R.       | No R.     | No R.   | No R.     |
| Patient 10 | PSP   | Female | 44  | No              | 12                         | Yes         | Yes         | Yes         | Yes         | Yes         | Yes        | No          | No          | Yes         | Yes       | No      | No        |
| Patient 10 | TTP   |        |     |                 |                            | Partial R.  | Partial R.  | No R.       | No R.       | No R.       | No R.      | No          | No          | No R.       | No R.     | No      | No        |
| Patient 11 | PSP   | Female | 31  | No              | 13                         | Yes         | Yes         | Yes         | Yes         | No          | Yes        | No          | No          | Yes         | No        | No      | No        |
| Patient 11 | TTP   |        |     |                 |                            | Complete R. | Partial R.  | No R.       | No R.       | No          | No R.      | No          | No          | No R.       | No        | No      | No        |
| Patient 12 | PSP   | Female | 30  | No              | 7                          | Yes         | Yes         | Yes         | Yes         | Yes         | No         | Yes         | Yes         | No          | No        | No      | No        |
| Patient 12 | TTP   |        |     |                 |                            | Partial R.  | Partial R.  | No R.       | Partial R.  | No R.       | No         | No R.       | No R.       | No          | No        | No      | No        |
| Patient 13 | PSP   | Female | 33  | Yes             | 12                         | No          | Yes         | Yes         | Yes         | Yes         | Yes        | Yes         | Yes         | Yes         | Yes       | No      | No        |
| Patient 13 | TTP   |        |     |                 |                            | No          | No R.       | No R.       | Partial R.  | No R.       | Partial R. | No R.       | Partial R.  | Partial R.  | No R.     | No      | No        |
| Patient 14 | PSP   | Female | 35  | No              | 3                          | No          | No          | Yes         | Yes         | No          | No         | Yes         | No          | No          | No        | Yes     | Yes       |

NSP: no symptoms patients; PSP: persistent symptoms patients; TTP: treated patients; R.: recovery.

Table S2. Hemogram of each individual.

| Patients                               | NSP  |      |      |      |      | PSP  |      |      |      |      |      |      |      |      |      | TTP  |      |      |      |      |      |      | Normal values |
|----------------------------------------|------|------|------|------|------|------|------|------|------|------|------|------|------|------|------|------|------|------|------|------|------|------|---------------|
|                                        | P1   | P2   | P3   | P4   | P5   | P6   | P7   | P8   | P9   | P10  | P11  | P12  | P13  | P14  | P6   | P7   | P8   | P9   | P10  | P11  | P12  | P13  |               |
| Platelets                              | 277  | 261  | 246  | 232  | 190  | 209  | 182  | 219  | 246  | 214  | 286  | 370  | 212  | 350  | 223  | 203  | 234  | 238  | 223  | 264  | 389  | 193  | 140 - 450     |
| Neutrophils (10 <sup>6</sup> cells/uL) | 3.2  | 2.6  | 3.7  | 4.3  | 3.2  | 3.3  | 4.5  | 4.1  | 2.3  | 2.6  | 2.2  | 5.6  | 3.2  | 4.8  | 6    | 11   | 5.2  | 6.3  | 5.6  | 7    | 10.2 | 7.6  | 1.8 - 7.6     |
| Neutrophils (%)                        | 52.4 | 49.3 | 61.5 | 59.8 | 59.1 | 49.5 | 66.2 | 62.1 | 56.5 | 49.8 | 37.8 | 62.1 | 52.2 | 56.5 | 83.9 | 92.9 | 82.7 | 85.9 | 83.7 | 85.3 | 88.2 | 78   | 41.0 - 72.7   |
| Lymphocytes (10 <sup>6</sup> cells/uL) | 2.3  | 2.2  | 1.8  | 2.1  | 1.8  | 2.8  | 1.7  | 1.7  | 1.4  | 2.1  | 2.7  | 2.3  | 2.3  | 3.1  | 1.1  | 0.7  | 0.9  | 0.9  | 1    | 1.1  | 1.1  | 1.6  | 1.2 - 4.2     |
| Lymphocytes (%)                        | 38.2 | 42.5 | 29.5 | 29.4 | 32.5 | 42   | 24.5 | 25.9 | 33.4 | 40.3 | 46.8 | 25.3 | 37.4 | 36.6 | 15.1 | 5.9  | 14.2 | 12.3 | 14.2 | 13.7 | 9.7  | 16.4 | 20.1 - 49.0   |
| Monocytes (10 <sup>6</sup> cells/uL)   | 0.4  | 0.4  | 0.3  | 0.6  | 0.4  | 0.4  | 0.6  | 0.6  | 0.4  | 0.4  | 0.4  | 0.8  | 0.6  | 0.5  | 0.1  | 0.1  | 0.2  | 0.1  | 0.1  | 0.1  | 0.2  | 0.5  | 0.2 - 0.9     |
| Monocytes (%)                          | 6.9  | 6.9  | 5.3  | 7.9  | 6.8  | 6.6  | 8.1  | 8.5  | 8.9  | 7.5  | 6.9  | 8.6  | 10.3 | 6.1  | 0.9  | 1.1  | 2.6  | 1.6  | 1.8  | 0.8  | 1.9  | 5.5  | 3.4 - 10.6    |
| Eosinophils (10 <sup>6</sup> cells/uL) | 0.1  | 0    | 0.2  | 0.1  | 0.1  | 0.1  | 0.1  | 0.1  | 0    | 0.1  | 0.5  | 0.3  | 0    | 0    | 0    | 0    | 0    | 0    | 0    | 0    | 0    | 0    | 0.0 - 0.5     |
| Eosinophils (%)                        | 2.1  | 0.9  | 3.2  | 2.1  | 1    | 1.4  | 0.8  | 2.3  | 0.5  | 1.7  | 7.7  | 3.7  | 0    | 0.4  | 0    | 0    | 0.1  | 0    | 0.1  | 0    | 0    | 0    | 0.3 - 5.6     |

|                                      |     |     |     |     |     |     |     |     |     |     |     |     |     |     |     |     |     |     |     |     |     |     |           |
|--------------------------------------|-----|-----|-----|-----|-----|-----|-----|-----|-----|-----|-----|-----|-----|-----|-----|-----|-----|-----|-----|-----|-----|-----|-----------|
| Basophils (10 <sup>6</sup> cells/uL) | 0   | 0   | 0   | 0.1 | 0   | 0   | 0   | 0.1 | 0   | 0   | 0   | 0   | 0   | 0   | 0   | 0   | 0   | 0   | 0   | 0   | 0   | 0   | 0.0 - 0.2 |
| Basophils (%)                        | 0.4 | 0.4 | 0.5 | 0.8 | 0.6 | 0.5 | 0.4 | 1.2 | 0.7 | 0.7 | 0.8 | 0.3 | 0.1 | 0.4 | 0.1 | 0.1 | 0.4 | 0.2 | 0.2 | 0.2 | 0.2 | 0.1 | 0.2 - 2.1 |

**Table S3. Autoantibodies.**

[illegible]

|                 |          |          |          |          |          |          |          |          |          |          |          |          |          |          |          |
|-----------------|----------|----------|----------|----------|----------|----------|----------|----------|----------|----------|----------|----------|----------|----------|----------|
| <b>Neuronal</b> |          |          |          |          |          |          |          |          |          |          |          |          |          |          |          |
| GAD65           | Negative |
| SOX1            | Negative |
| Ma2             | Negative |
| Ma1             | Negative |
| Amphiphysin     | Negative |
| CV 2 (CRMP5)    | Negative |
| Ri              | Negative |
| Yo              | Negative |
| HuD             | Negative |

---

NSP: no symptoms patients; PSP: persistent symptoms patients; TTP: treated patients.
